# Supplementary material for: Effectiveness of Four Vaccines in Preventing SARS-CoV-2 Infection in Kazakhstan
Source: bioRxiv or medRxiv preprint supplement (doi:10.1101/2022.04.14.22273868), 2022-04-18

### Individual data

### Aggregate data

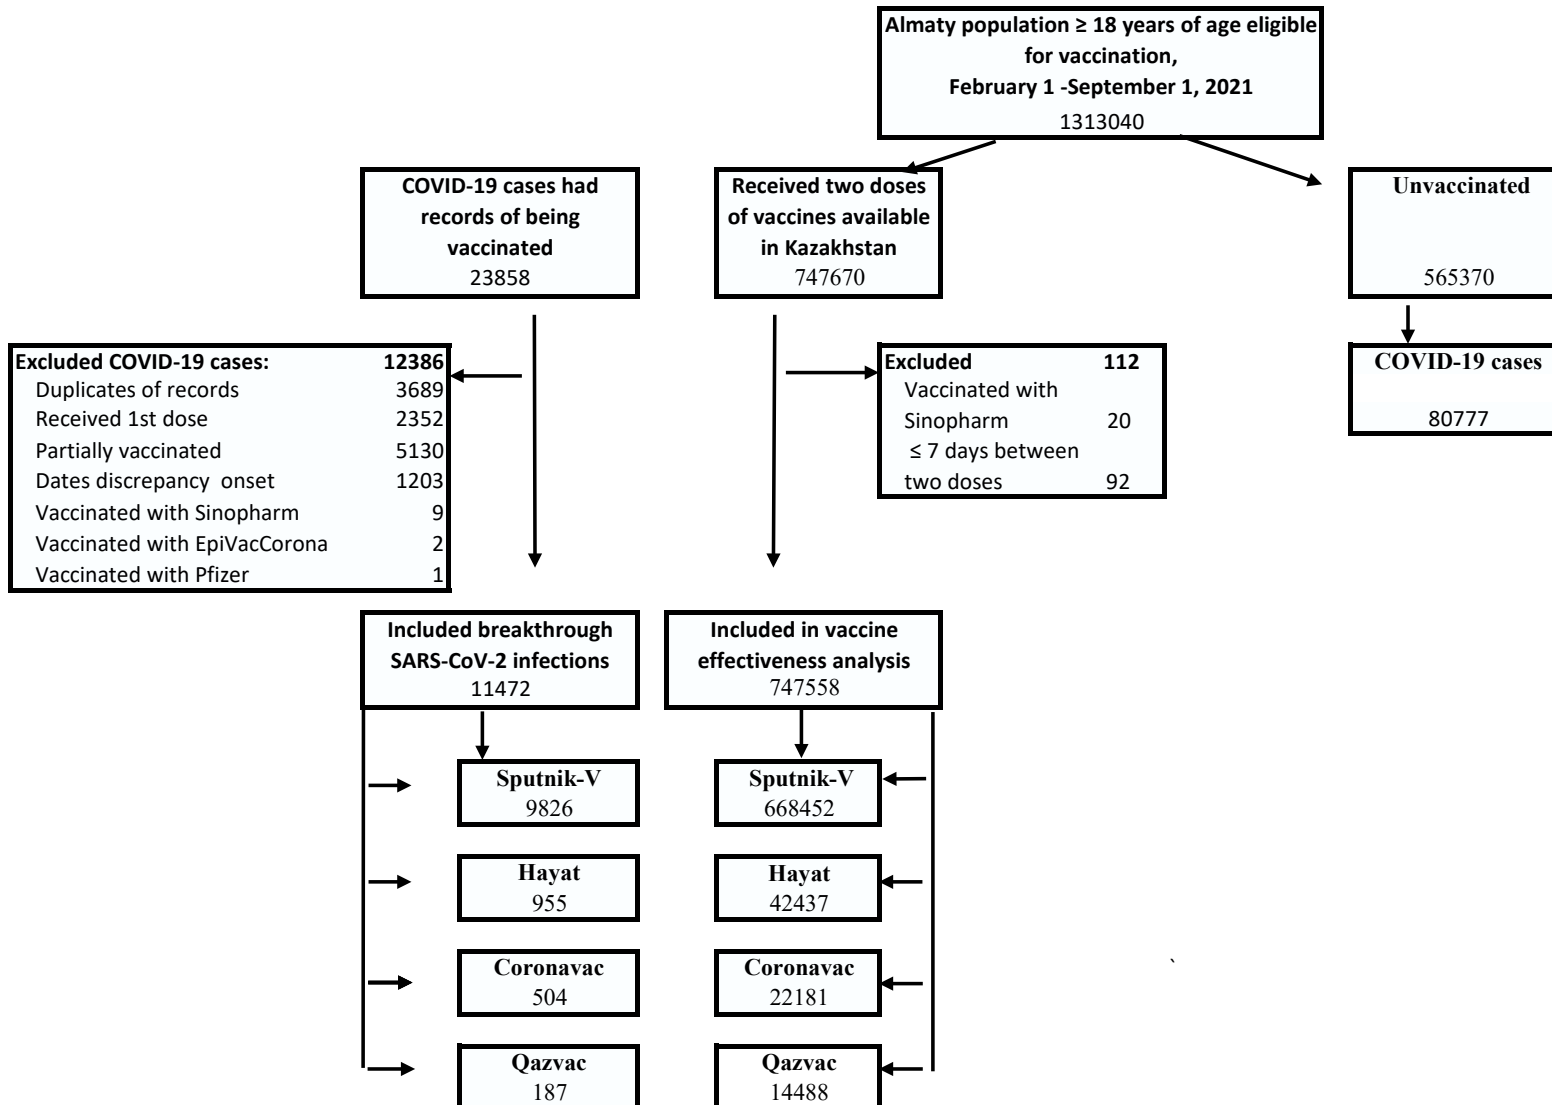

Supplement: Supplementary file [file media-1.pdf]
